# Supplementary material for: Precise timing of MIS 7 sub-stages from the Austrian Alps
Source: Copernicus journal article supplement (doi:10.5194/cp-2020-145), 2020-11-20
Supplement: Supplementary file 1 [file cp-2020-145-supplement.pdf]

1  
2  
3  
4  
5  
6

Supplementary materials for “Precise timing of MIS 7 sub-stages from the Austrian Alps”

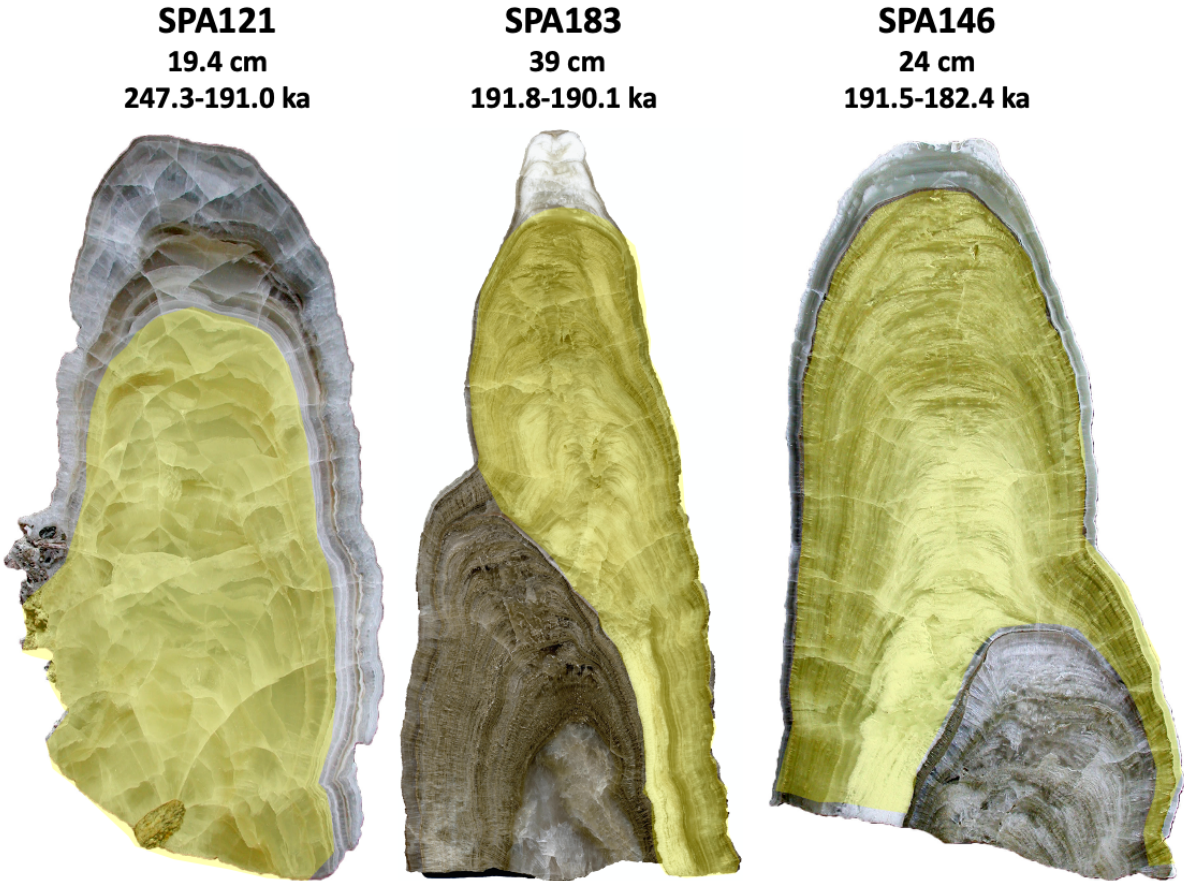

7  
8  
9

Supplementary figure 1: Stalagmites SPA121, 183, and 146. MIS 7 growth sections highlighted in yellow

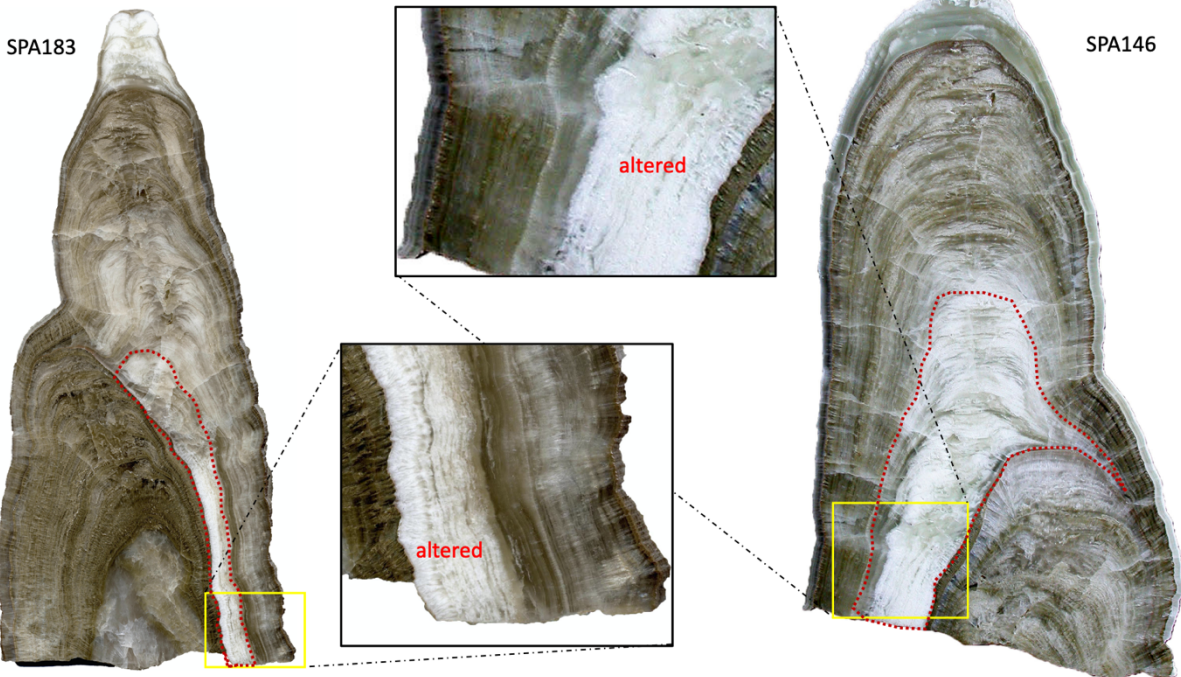

10  
11  
12  
13

Supplementary figure 2: Diagenetically altered portions of SPA183 and 146 highlighted by dashed red lines.

### SPA146

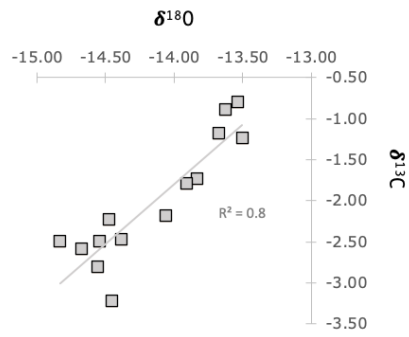

### SPA183

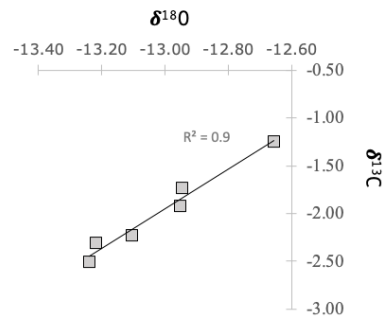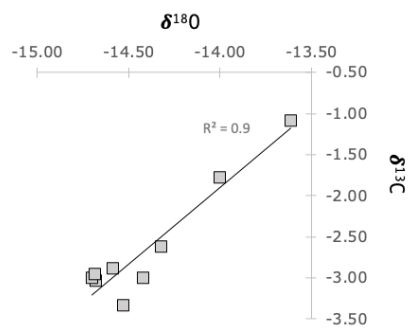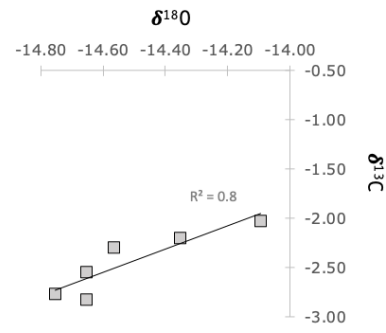

14  
15  
16  
17  
18

Supplementary figure 3: HENDY tests of SPA146 and SPA183 with respective  $r^2$  values.

| Sample | DFT *  | <sup>238</sup> U | <sup>232</sup> Th | $\delta^{234}\text{U}^{**}$ | <sup>230</sup> Th / <sup>232</sup> Th | <sup>230</sup> Th / <sup>238</sup> U | <sup>230</sup> Th Age (yr) | <sup>230</sup> Th Age (yr) | $\delta^{234}\text{U}_{\text{Initial}}^{****}$ | Comments |
|--------|--------|------------------|-------------------|-----------------------------|---------------------------------------|--------------------------------------|----------------------------|----------------------------|------------------------------------------------|----------|
| ID     | (mm)   | (ppb)            | (ppt)             | ( $\delta$ -units)          | (atomic $\cdot 10^{-6}$ )             | (activity)                           | (uncorrected)              | (corrected)***             | ( $\delta$ -units)                             |          |
| SPA121 | 48.45  | 7968 ± 24        | 1768 ± 5          | -7.0 ± 0.4                  | 51,278 ± 20                           | 0.68983 ± 0.00034                    | 129,658 ± 174              | 129,700 ± 174              | -10.1 ± 0.6                                    |          |
| SPA121 | 51.5   | 11826 ± 36       | 77.2 ± 0.3        | -114.7 ± 0.2                | 1,794,848 ± 4171                      | 0.71056 ± 0.00034                    | 191,338 ± 298              | 191,300 ± 298              | -196.8 ± 0.3                                   |          |
| SPA121 | 55.05  | 4611 ± 40        | 458 ± 4           | -111.5 ± 1.0                | 119,160 ± 96                          | 0.71832 ± 0.00059                    | 194,908 ± 963              | 194,900 ± 963              | -193.2 ± 1.8                                   |          |
| SPA121 | 60.45  | 5365 ± 22        | 1857 ± 8          | -112.6 ± 0.1                | 34,284 ± 9                            | 0.71975 ± 0.00020                    | 197,012 ± 192              | 197,000 ± 192              | -196.3 ± 0.2                                   |          |
| SPA121 | 67.95  | 544 ± 4          | 2605 ± 17         | -114.2 ± 0.1                | 2,488 ± 1                             | 0.72294 ± 0.00020                    | 201,144 ± 215              | 201,000 ± 248              | -201.4 ± 0.3                                   |          |
| SPA121 | 80.25  | 4704 ± 19        | 241 ± 1           | -117.8 ± 0.2                | 232,223 ± 280                         | 0.72254 ± 0.00045                    | 204,110 ± 439              | 204,100 ± 439              | -209.6 ± 0.4                                   |          |
| SPA121 | 81.5   | 4440 ± 9         | 90.4 ± 0.2        | -116.6 ± 0.7                | 587,734 ± 180                         | 0.72577 ± 0.00028                    | 205,909 ± 676              | 205,900 ± 676              | -208.5 ± 1.2                                   |          |
| SPA121 | 83.7   | 5817 ± 20        | 398 ± 1           | -114.0 ± 0.2                | 176,846 ± 178                         | 0.73463 ± 0.00030                    | 211,533 ± 340              | 211,500 ± 340              | -207.0 ± 0.4                                   |          |
| SPA121 | 91.95  | 6600 ± 18        | 919 ± 3           | -111.2 ± 0.2                | 87,484 ± 78                           | 0.73921 ± 0.00045                    | 213,138 ± 462              | 213,100 ± 462              | -203.0 ± 0.4                                   |          |
| SPA121 | 106.95 | 9049 ± 50        | 1042 ± 6          | -112.0 ± 0.2                | 106,046 ± 38                          | 0.74064 ± 0.00027                    | 215,316 ± 316              | 215,300 ± 316              | -205.6 ± 0.3                                   |          |
| SPA121 | 115.2  | 8471 ± 37        | 801 ± 3           | -107.9 ± 0.1                | 130,187 ± 335                         | 0.74624 ± 0.00088                    | 216,448 ± 879              | 216,400 ± 879              | -198.7 ± 0.5                                   |          |
| SPA121 | 119.7  | 5582 ± 20        | 721 ± 3           | -104.5 ± 0.2                | 95,699 ± 36                           | 0.75015 ± 0.00030                    | 216,779 ± 341              | 216,800 ± 341              | -192.7 ± 0.3                                   |          |
| SPA121 | 132.45 | 12151 ± 33       | 115.1 ± 0.3       | -100.7 ± 0.2                | 1,317,303 ± 1119                      | 0.75713 ± 0.00022                    | 219,543 ± 278              | 219,500 ± 278              | -187.0 ± 0.3                                   |          |
| SPA121 | 137    | 10734 ± 40       | 62.1 ± 0.2        | -108.9 ± 0.1                | 2,155,246 ± 1062                      | 0.75651 ± 0.00015                    | 228,461 ± 229              | 228,500 ± 229              | -207.5 ± 0.3                                   |          |
| SPA121 | 142.2  | 12559 ± 37       | 434 ± 1           | -108.1 ± 0.2                | 362,477 ± 63                          | 0.75994 ± 0.00016                    | 231,348 ± 273              | 231,300 ± 273              | -207.7 ± 0.3                                   |          |
| SPA121 | 146.7  | 19031 ± 95       | 1909 ± 10         | -104.2 ± 0.2                | 126,242 ± 21                          | 0.76807 ± 0.00018                    | 235,745 ± 315              | 235,700 ± 315              | -202.7 ± 0.4                                   |          |
| SPA121 | 151.95 | 8291 ± 21        | 6023 ± 15         | -103.6 ± 0.1                | 17,484 ± 5                            | 0.77024 ± 0.00016                    | 237,565 ± 270              | 237,500 ± 271              | -202.6 ± 0.3                                   |          |
| SPA121 | 166.95 | 7963 ± 17        | 3632 ± 8          | -101.6 ± 0.1                | 28,003 ± 6                            | 0.77450 ± 0.00014                    | 240,013 ± 233              | 240,000 ± 233              | -200.1 ± 0.3                                   |          |
| SPA121 | 172.2  | 11373 ± 34       | 568 ± 2           | -100.6 ± 0.1                | 256,448 ± 111                         | 0.77719 ± 0.00023                    | 241,878 ± 349              | 241,900 ± 349              | -199.0 ± 0.3                                   |          |
| SPA121 | 176.7  | 13101 ± 38       | 381 ± 1           | -103.1 ± 0.1                | 438,800 ± 84                          | 0.77461 ± 0.00012                    | 242,182 ± 239              | 242,200 ± 239              | -204.1 ± 0.3                                   |          |
| SPA121 | 179    | 7146 ± 41        | 294 ± 2           | -104.7 ± 0.2                | 309,300 ± 100                         | 0.77291 ± 0.00025                    | 242,367 ± 449              | 242,400 ± 449              | -207.5 ± 0.5                                   |          |
| SPA121 | 184.2  | 14267 ± 100      | 1423 ± 10         | -101.4 ± 0.1                | 128,412 ± 39                          | 0.77694 ± 0.00022                    | 242,679 ± 331              | 242,700 ± 331              | -201.0 ± 0.3                                   |          |
| SPA121 | 187.20 | 13014 ± 45       | 1269 ± 4          | -101.6 ± 0.1                | 131,929 ± 27                          | 0.78007 ± 0.00016                    | 247,158 ± 287              | 247,200 ± 287              | -204.2 ± 0.3                                   |          |
| SPA121 | 190.95 | 12265 ± 50       | 2350 ± 10         | -102.8 ± 0.1                | 67,046 ± 16                           | 0.77904 ± 0.00019                    | 247,540 ± 329              | 247,500 ± 329              | -206.7 ± 0.3                                   |          |
| SPA121 | 193.8  | 11327 ± 41       | 10467 ± 38        | -101.1 ± 0.1                | 13,930 ± 10                           | 0.78067 ± 0.00017                    | 247,160 ± 274              | 247,100 ± 275              | -203.1 ± 0.3                                   |          |
| SPA146 | 15     | 71975 ± 6        | 118294 ± 11       | 20.4 ± 0.3                  | 8,351 ± 14                            | 0.83235 ± 0.00045                    | 182,359 ± 301              | 182,300 ± 302              | 34.0 ± 0.5                                     |          |
| SPA146 | 73     | 17117 ± 126      | 71739 ± 530       | 188.3 ± 0.2                 | 3,982 ± 5                             | 1.01197 ± 0.00034                    | 188,376 ± 193              | 188,300 ± 204              | 320.3 ± 0.5                                    |          |
| SPA146 | 101    | 17357 ± 154      | 23985 ± 218       | 180.3 ± 0.3                 | 11,988 ± 25                           | 1.00474 ± 0.00049                    | 188,759 ± 264              | 188,700 ± 265              | 307.1 ± 0.5                                    |          |
| SPA146 | 115    | 17722 ± 495      | 11210 ± 313       | 200.8 ± 0.3                 | 26,885 ± 8                            | 1.03135 ± 0.00032                    | 191,502 ± 224              | 191,500 ± 224              | 344.7 ± 0.6                                    |          |
| SPA146 | 154    | 57825 ± 9        | 3039 ± 1          | 165.9 ± 0.3                 | 312,313 ± 304                         | 0.99529 ± 0.00036                    | 191,197 ± 236              | 191,200 ± 236              | 284.6 ± 0.6                                    | altered  |
| SPA146 | 162    | 66265 ± 12       | 8706 ± 2          | 161.8 ± 0.3                 | 124,491 ± 136                         | 0.99210 ± 0.00040                    | 191,675 ± 261              | 191,700 ± 261              | 277.9 ± 0.6                                    | altered  |
| SPA146 | 180    | 42731 ± 3        | 2421 ± 2          | 185.4 ± 0.3                 | 295,821 ± 787                         | 1.01608 ± 0.00076                    | 191,702 ± 400              | 191,700 ± 400              | 318.4 ± 0.7                                    | altered  |
| SPA183 | 85     | 20686 ± 353      | 138708 ± 2367     | 163.8 ± 0.3                 | 2,440 ± 1                             | 0.99199 ± 0.00053                    | 190,649 ± 306              | 190,500 ± 324              | 280.4 ± 0.6                                    |          |
| SPA183 | 138.8  | 18743 ± 406      | 10928 ± 237       | 161.0 ± 0.2                 | 27,988 ± 9                            | 0.98970 ± 0.00032                    | 190,908 ± 187              | 190,900 ± 187              | 275.9 ± 0.4                                    |          |
| SPA183 | 140    | 2135 ± 3         | 2908 ± 4          | 169.5 ± 0.2                 | 12,125 ± 19                           | 1.00172 ± 0.00037                    | 192,578 ± 214              | 192,600 ± 215              | 291.8 ± 0.4                                    |          |
| SPA183 | 160    | 19652 ± 335      | 5839 ± 100        | 174.9 ± 0.2                 | 55,716 ± 13                           | 1.00405 ± 0.00025                    | 191,040 ± 150              | 191,000 ± 151              | 299.8 ± 0.3                                    |          |
| SPA183 | 225.2  | 16905 ± 412      | 8469 ± 207        | 193.4 ± 0.2                 | 33,686 ± 22                           | 1.02449 ± 0.00062                    | 191,806 ± 314              | 191,800 ± 314              | 332.3 ± 0.5                                    |          |
| SPA183 | 220    | 26714 ± 2        | 12903 ± 2         | 252.1 ± 0.3                 | 36,934 ± 73                           | 1.08175 ± 0.00069                    | 190,760 ± 336              | 190,800 ± 336              | 431.8 ± 0.7                                    | altered  |

19  
20  
21  
22  
23  
24  
25  
26  
27  
28  
29

**Supplementary table 1: U-Th dating results for Spannagel stalagmites included in this study. Uncertainties are 2σ. U decay constants:  $\lambda_{238} = 1.55125 \times 10^{-10}$  (Jaffey et al. 1971) and  $\lambda_{234} = 2.82206 \times 10^{-6}$  (Cheng et al. 2013). Th decay constant:  $\lambda_{230} = 9.1705 \times 10^{-6}$  (Cheng et al. 2013). Corrected  $^{230}\text{Th}$  ages assume the initial  $^{230}\text{Th}/^{232}\text{Th}$  atomic ratio of  $4.4 \pm 2.2 \times 10^{-6}$ . Those are the values for a material at secular equilibrium, with the bulk earth  $^{232}\text{Th}/^{238}\text{U}$  value of 3.8. The errors are arbitrarily assumed to be 50%. DFT\* = distance from top. \*\*  $\delta^{234}\text{U} = ([^{234}\text{U}/^{238}\text{U}]_{\text{activity}} - 1) \times 1000$ . \*\*\*BP stands for “Before Present” where the “Present” is defined as the year 1950 A.D. \*\*\*\*  $\delta^{234}\text{U}_{\text{initial}}$  was calculated based on  $^{230}\text{Th}$  age (T), i.e.  $\delta^{234}\text{U}_{\text{initial}} = \delta^{234}\text{U}_{\text{measured}} \times e^{(\lambda_{234})(T)}$ . *Italicized ages were sampled within the altered portions of stalagmites SPA146 and 183 (see text for details), and were not included in final age models.***
